# Supplementary material for: Prognostic Immune Effector Signature in Adult Acute Lymphoblastic Leukemia Patients Is Dominated by γδ T Cells
Source: MDPI journal article supplement (doi:10.3390/cells12131693), 2023-06-22
Supplement: s1 [file s1]

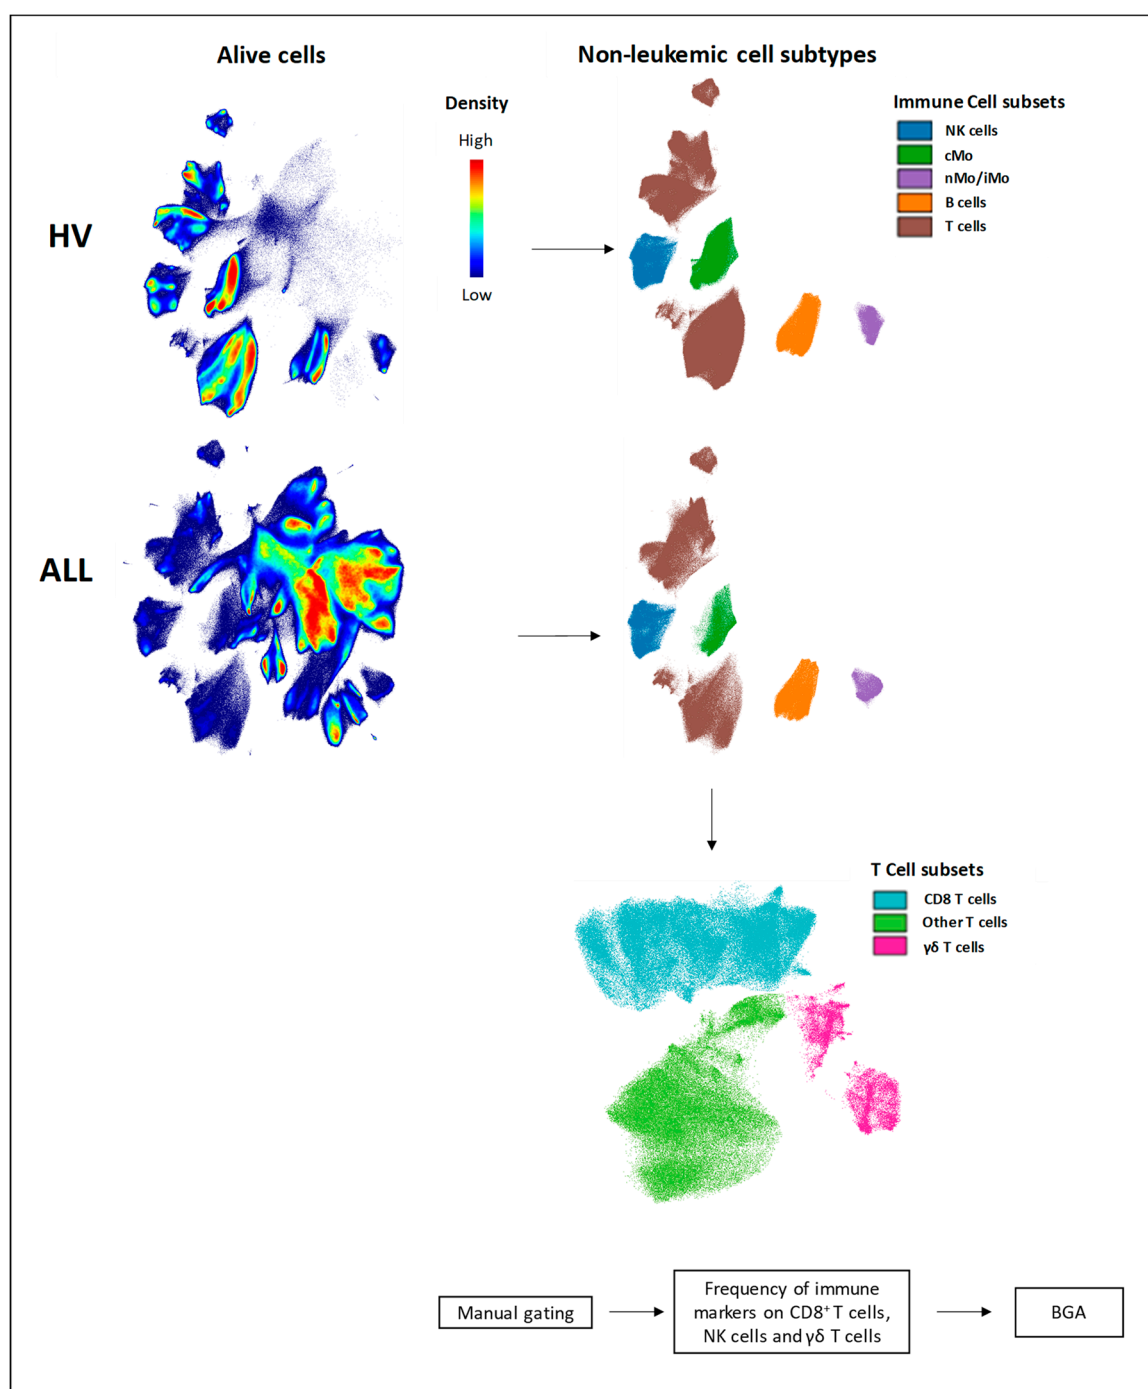

**Figure S1.** Dimensionality-reduction analysis of PBMCs from HV and newly diagnosed ALL patients enables identification of non-leukemic cells. Consensus files were generated using uniform manifold approximation and projection (UMAP) dimensionality-reduction technique. Leukemic cells were excluded from a total of 4,800,000 alive cells (1,200,000 cells in each group; HV, B-ALL, T-ALL and Ph<sup>+</sup> ALL). Immune cell subsets and T-cell subsets from HV and ALL patients were preliminary identified from consensus files generated using Uniform Manifold Approximation and Projection (UMAP) dimensionality-reduction technique. Frequency of immune markers were then manually gated and used in the BGA.

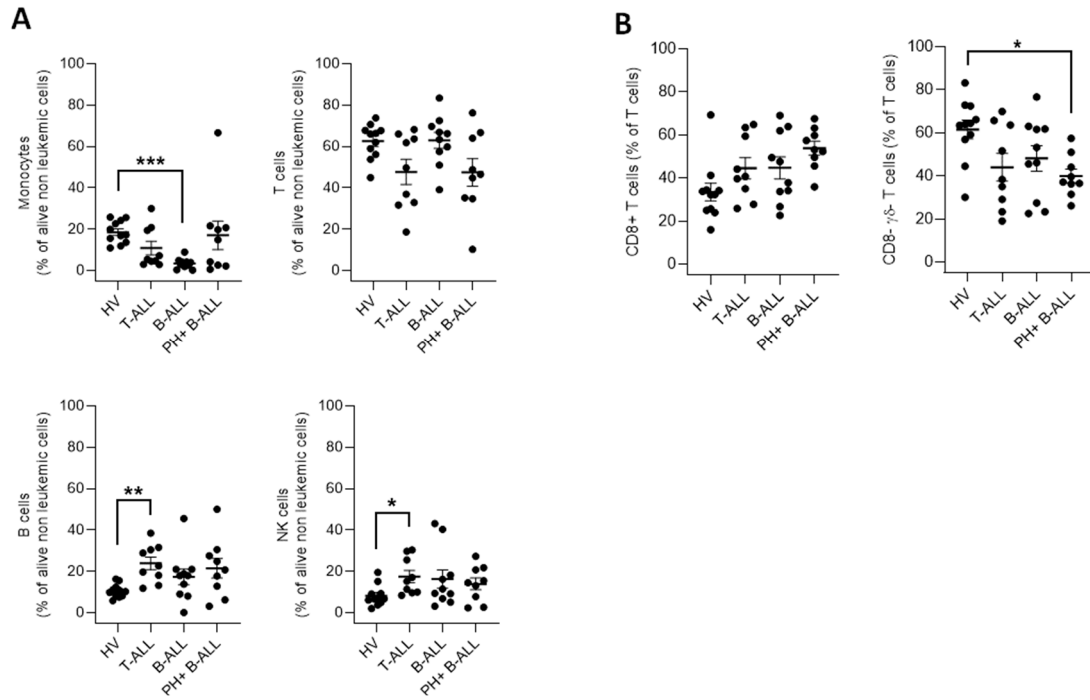

**Figure S2.** Comparative frequencies of circulating immune subsets in HV and ALL patients. Proportion of immune subset in PBMCs of 11 HV, 10 B-ALL, 9 B-ALL Ph<sup>+</sup> and 9 T-ALL patients. **(A)** Proportion of monocytes, T cells, B cells and NK cells among non-leukemic cells (%). **(B)** Proportion of CD8<sup>+</sup> T cells and CD8<sup>-</sup>γδ<sup>-</sup> T cells among T cells (%). Data are expressed as mean ± SEM. The statistical significance was established using a Kruskal-Wallis with Dunn's post-test. \*p < 0.05.

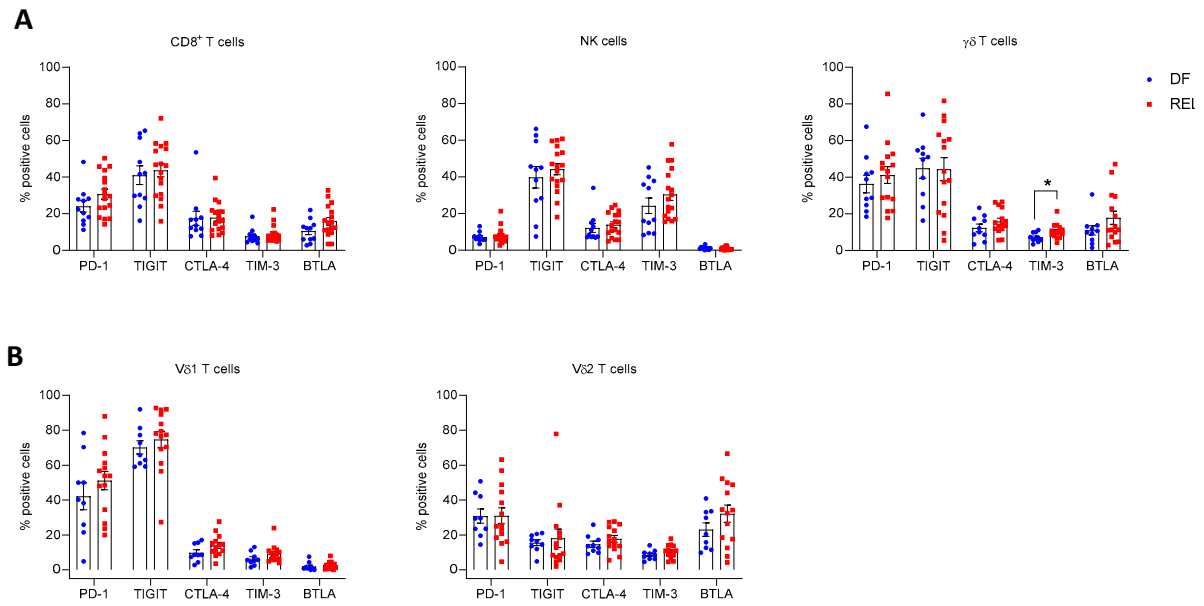

**Figure S3.** Immune check-point expression on circulating immune effectors. Comparison of the expression of PD-1, TIGIT, CTLA-4, TIM-3 and BTLA expression (**A**) on the surface of CD8<sup>+</sup> T cells and NK cells (n=28 patients), γδ T cells (n=25 patients); (**B**) on the surface of Vδ1 T cells and Vδ2 T cells (n=23 patients). Data are expressed as mean ± SEM. The statistical significance was established using a Mann-Whitney test. \*p< 0.05.

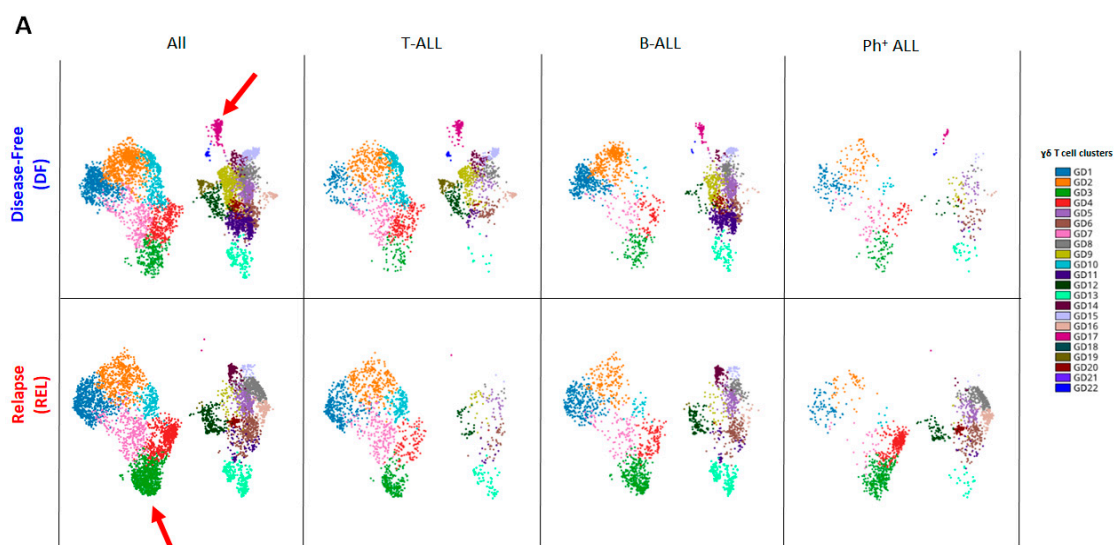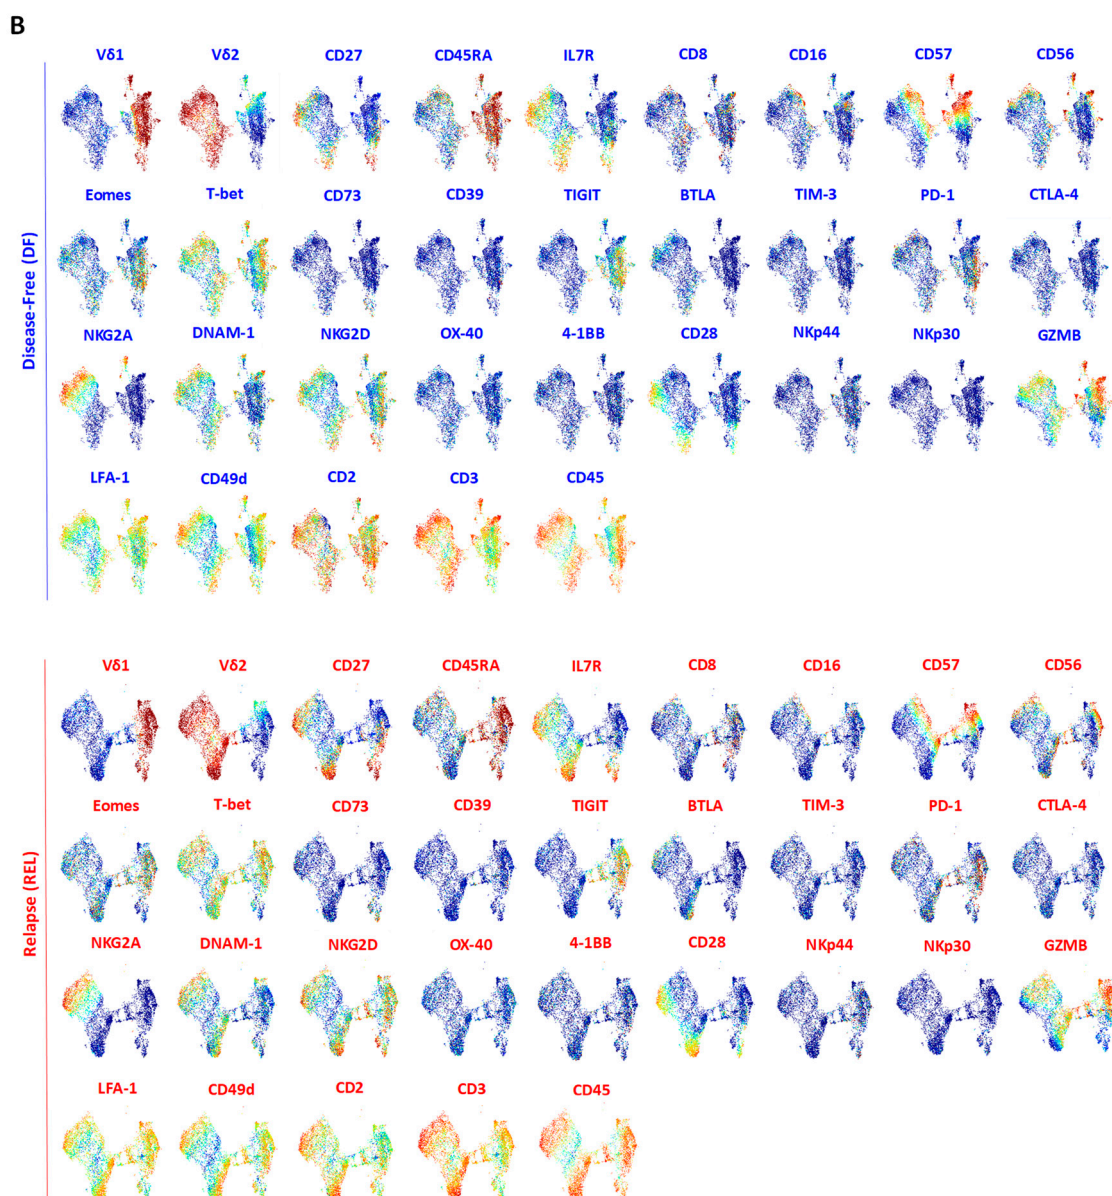

**Figure S4.** V $\delta$ 1 and V $\delta$ 2 T-cell clusters have different repartition according to ALL lineage. **(A)** UMAP and PhenoGraph clustering allows the automatic identification of 22  $\gamma\delta$  T-cell clusters according to the coexpression of 32 markers. Upper panels concern DF group and from right to left are described all DF patients, T-ALL, B-ALL and Ph<sup>+</sup> ALL patients (n=4; 4 and 3 respectively). Lower panels concern REL group and from right to left are described all REL patients, T-ALL, B-ALL and Ph<sup>+</sup> ALL patients (n=5; 6 and 6 respectively). The red arrows in the right panels indicate  $\gamma\delta$  T-cell clusters with similar changes according to the relapse group. **(B)** Expression of  $\gamma\delta$  T-cell markers which were used for PhenoGraph clustering (blue, low expression; red, high expression).

**Supplementary Table S1.** Patient, disease characteristics and response to treatment

|                          | All patients<br>N = 28 (100) |
|--------------------------|------------------------------|
| Age, years               |                              |
| Median [range]           | 48 [23-80]                   |
| >60                      | 8 (28.6)                     |
| Gender                   |                              |
| Male                     | 14 (50)                      |
| Female                   | 14 (50)                      |
| WBC, x10 <sup>9</sup> /L |                              |
| Median [range]           | 76.1 [0.1-347]               |
| High WBC count           | 19 (67.8)                    |
| FAB subtype              |                              |
| B                        | 19 (67.9)                    |
| B Ph-                    | 10 (52.6)                    |
| B Ph+                    | 9 (47.4)                     |
| T                        | 9 (32.1)                     |
| PB blasts, %             |                              |
| Mean (SD)                | 84.3 (9.6)                   |
| Induction                | 28 (100)                     |
| CR after induction       | 100 (100)                    |
| MRD status               |                              |
| MRD+                     | 13 (46.4)                    |
| MRD-                     | 9 (32.1)                     |
| NA                       | 6 (21.5)                     |
| Allo-SCT                 | 14 (50)                      |
| Relapse                  | 17 (60.7)                    |

Allo-SCT: allogeneic hematopoietic stem cell transplantation in 1st complete remission; CR: complete remission; High WBC count :  $\geq 30 \times 10^9/L$  for B lineage and  $\geq 100 \times 10^9/L$  for T lineage; MRD : Minimal Residual Disease; NA : Not available; Ph-: Philadelphia chromosome-negative ALL; Ph+: Philadelphia chromosome-positive ALL; PB : peripheral blood; WBC: white blood cells.

**Supplementary Table S2.** Mass cytometry panel — Extracellular antibodies

| Antibodies         | Metal | Clones   | Source                                                          |
|--------------------|-------|----------|-----------------------------------------------------------------|
| CD45               | 89Y   | HI30     | Fluidigm                                                        |
| CD2                | 106Cd | 39c1.5   | Immunomonitoring Lab                                            |
| LFA1               | 110Cd | 2H8.3    | Immunomonitoring Lab                                            |
| CD19               | 111Cd | H1B19    | Purified : BioLegend and metal labeling kit : Fluidigm          |
| CD33               | 112Cd | WM53     | Purified : BioLegend and metal labeling kit: Fluidigm           |
| V $\delta$ 2       | 114Cd | IMMU389  | Purified : Beckman Coulter and metal labeling kit: Fluidigm     |
| CD3                | 115In | UCHT1    | Immunomonitoring Lab                                            |
| CD57               | 116Cd | HNK-1    | Purified : BioLegend and metal labeling kit: Fluidigm           |
| BTN3A              | 141Pr | 20.1     | Purified : Imcheck Therapeutic and metal labeling kit: Fluidigm |
| CD45RA             | 143Nd | HI100    | Fluidigm                                                        |
| CD73               | 145Nd | AD2      | Purified : BioLegend and metal labeling kit: Fluidigm           |
| CD8 $\alpha$       | 146Nd | RPA-T8   | Fluidigm                                                        |
| OX40               | 150Nd | ACT35    | Fluidigm                                                        |
| BTN2A1             | 151Eu | 7.48     | Purified : Imcheck Therapeutic and metal labeling kit: Fluidigm |
| CD39               | 152Sm | A1       | Purified : BioLegend and metal labeling kit: Fluidigm           |
| TIM-3              | 153Eu | F38-2E2  | Fluidigm                                                        |
| TIGIT              | 154Sm | MBSA43   | Fluidigm                                                        |
| PD-1               | 155Gd | EH12-2H7 | Fluidigm                                                        |
| 4-1BB              | 158Gd | 4B4-1    | Fluidigm                                                        |
| CD28               | 160Gd | CD28.2   | Fluidigm                                                        |
| BTLA               | 163Dy | MIH26    | Fluidigm                                                        |
| NKG2A              | 165Ho | REA110   | Purified : Miltenyi and metal labeling kit: Fluidigm            |
| NKG2D              | 166Er | ON72     | Fluidigm                                                        |
| CD27               | 167Er | O323     | Fluidigm                                                        |
| IL-7R              | 168Er | A019D5   | Fluidigm                                                        |
| NKp30              | 169Tm | Z25      | Purified :Beckman Coulter and metal labeling kit: Fluidigm      |
| TCR $\gamma\delta$ | 170Er | REA591   | Purified : Miltenyi and metal labeling kit: Fluidigm            |
| DNAM-1             | 171Yb | DX11     | Fluidigm                                                        |
| V $\delta$ 1       | 172Yb | REA173   | Purified : Miltenyi and metal labeling kit: Fluidigm            |
| ITGA4/CD49d        | 174Yb | 9F10     | Fluidigm                                                        |
| CD56               | 176Yb | NCAM16.2 | Fluidigm                                                        |
| NKp44              | 159Tb | P44-8    | Purified : Biolegend and metal labeling kit: Fluidigm           |
| CD16               | 209Bi | 3G8      | Fluidigm                                                        |

Mass cytometry panel — Intracellular antibodies

| Antibodies | Metal |          | Source                                                           |
|------------|-------|----------|------------------------------------------------------------------|
| Eomes      | 149Sm | X4-83    | Purified : BD Biosciences and metal labeling kit: Fluidigm       |
| Tbet       | 156Gd | 4B10     | Fluidigm                                                         |
| CTLA-4     | 161Dy | 14D3     | Fluidigm                                                         |
| Granzyme B | 173Yb | GB11     | Fluidigm                                                         |
| BTN2A2     | 175Lu | 418A7612 | Purified : ImCheck Therapeutics and metal labeling kit: Fluidigm |
